# Supplementary material for: A triple-layered, hierarchical 1D core–shell nanostructure with a plasmonic Ag octahedral core for use in solid-state dye-sensitized solar cells
Source: Royal Society of Chemistry journal article supplement (doi:10.1039/c5ta04566e), 2015-01-01

## Supporting Information

### **A Triple-layered, Hierarchical 1D Core-shell Nanostructure with a Plasmonic Ag Octahedra Core for Use in Solid-state Dye-sensitized Solar Cells**

Dong Jun Kim,<sup>a</sup> Sung Hoon Ahn,<sup>b</sup> Chang Soo Lee,<sup>a</sup> Jong Hak Kim<sup>\*a</sup>

<sup>a</sup> Department of Chemical and Biomolecular Engineering, Yonsei University, 50 Yonsei-ro, Seodaemun-gu, Seoul 120-749, South Korea. E-mail: [jonghak@yonsei.ac.kr](mailto:jonghak@yonsei.ac.kr)

<sup>b</sup> Department of Mechanical Engineering, Stanford University, Stanford, California 94305, United States

\*E-mail: [jonghak@yonsei.ac.kr](mailto:jonghak@yonsei.ac.kr)

Tel: +82-2-2123-5757; Fax: +82-2-312-6401

**Fig. S1.** FE-SEM image of Ag nanocubes synthesized with insufficient reactants and a shorter reaction time.

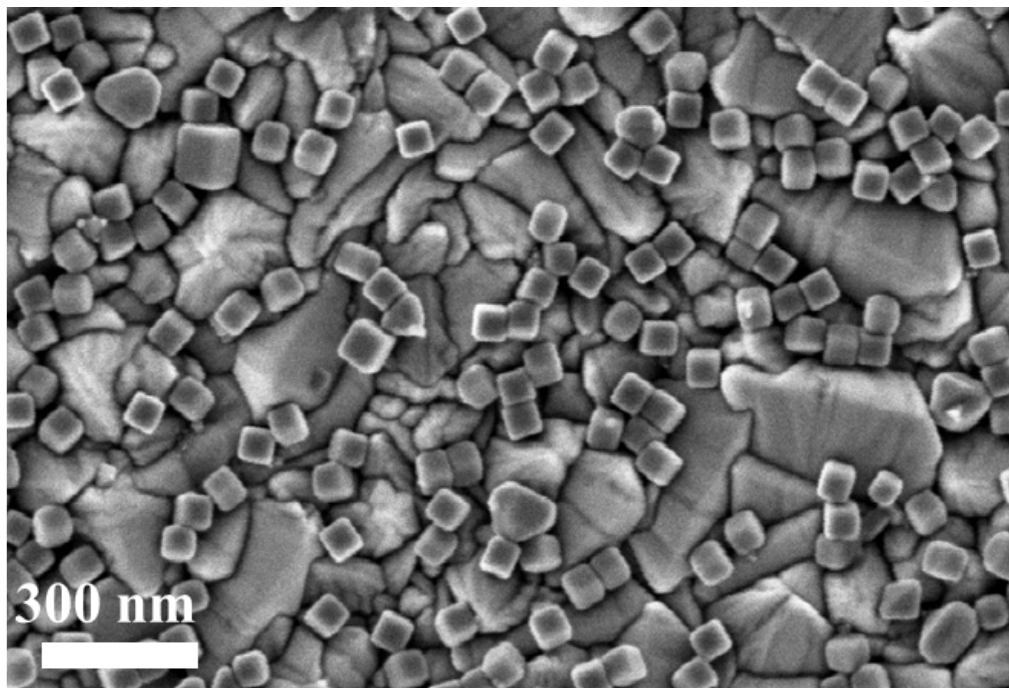

**Fig. S2.** FE-SEM (back-scattering mode) images of (a) AS0, (b) AS1, (c) AS2 and (d) AS3.

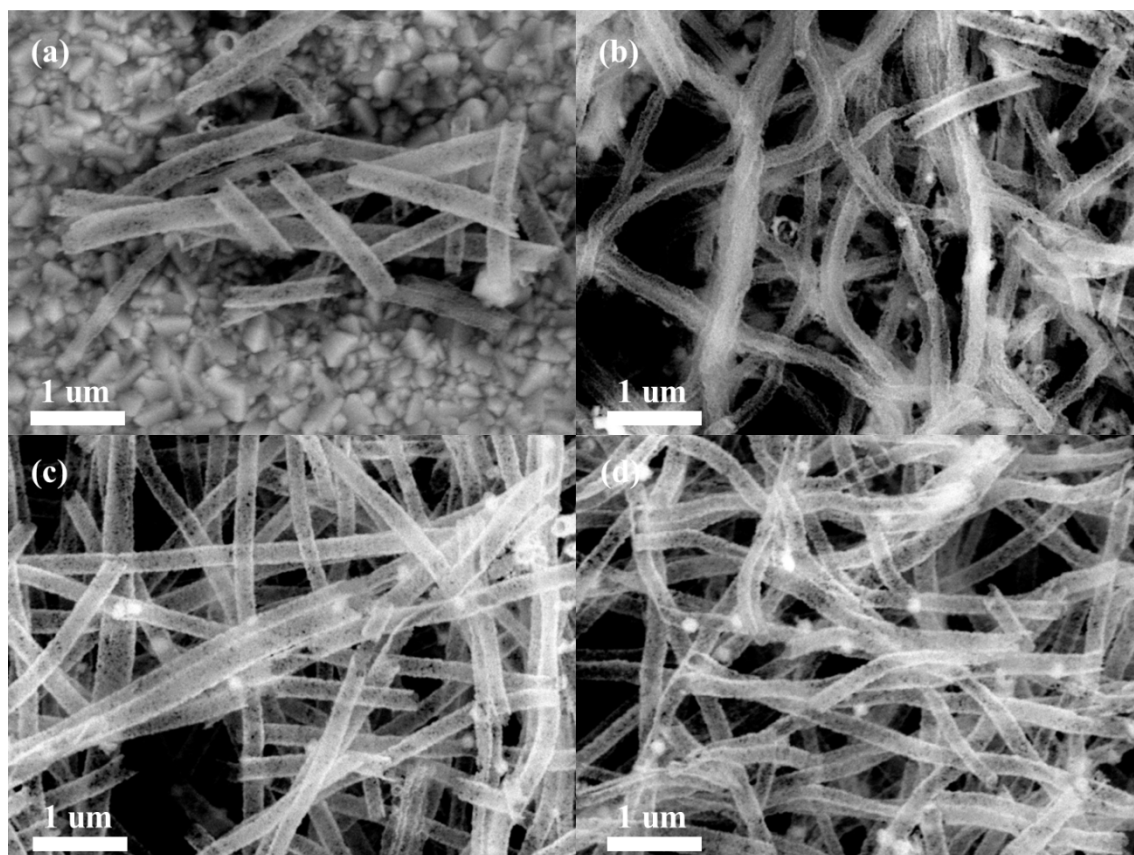

**Fig. S3.** XRD pattern of AST2 film.

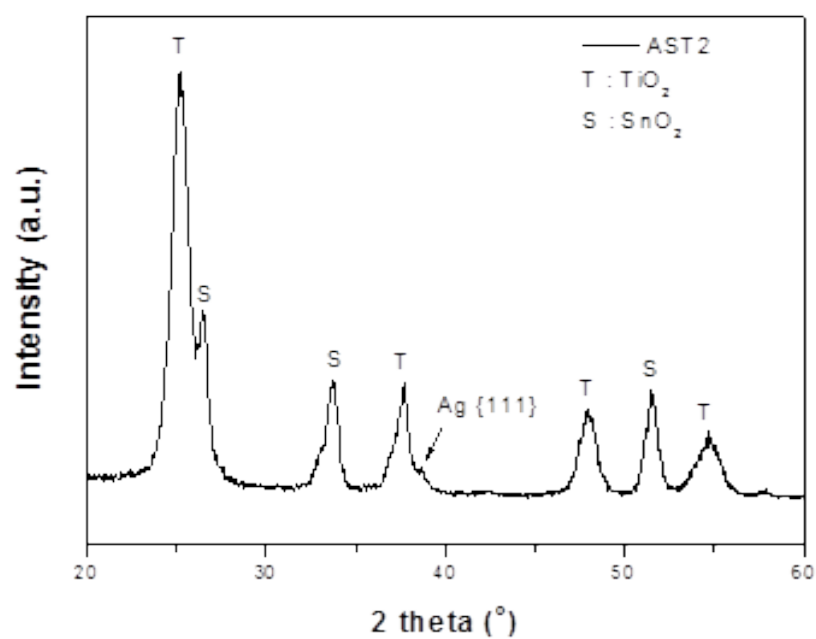

Supplement: c5ta04566e1.pdf [file c5ta04566e1.pdf]
